# Supplementary material for: Functional Similarities of Protein-Coding Genes in Topologically Associating Domains and Spatially-Proximate Genomic Regions
Source: MDPI journal article supplement (doi:10.3390/genes13030480), 2022-03-08
Supplement: s1 [file s1]

## Supplementary Material of

### Functional similarities of protein-coding genes in topologically associating domains and spatially-proximate genomic regions

#### 1 Supplementary Figures

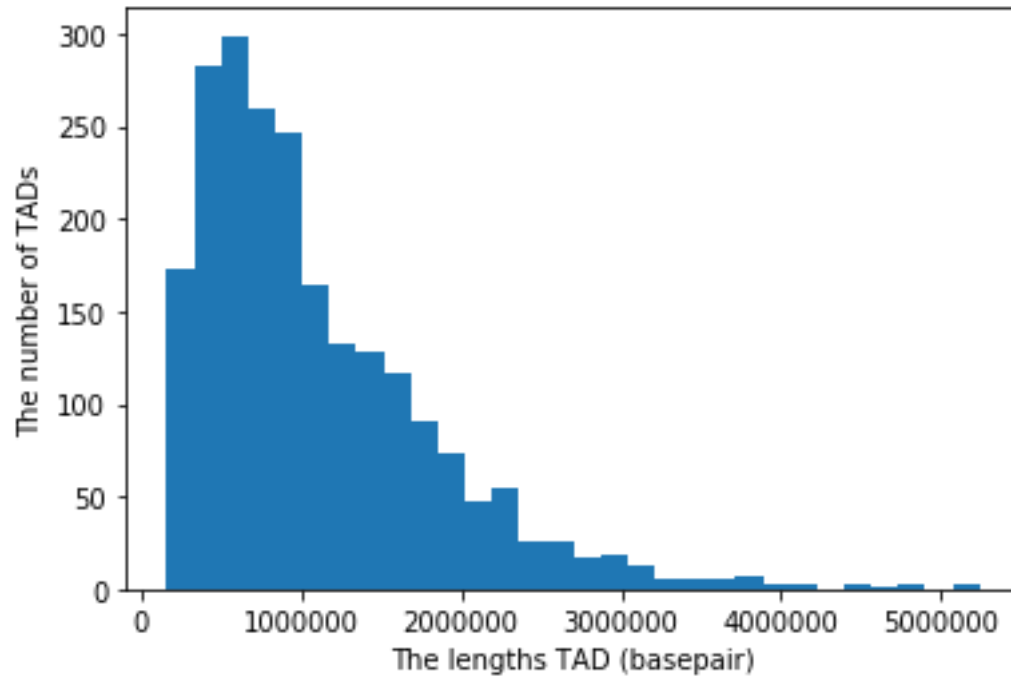

Supplementary Figure S1 The histogram of the lengths of TADs of mice.

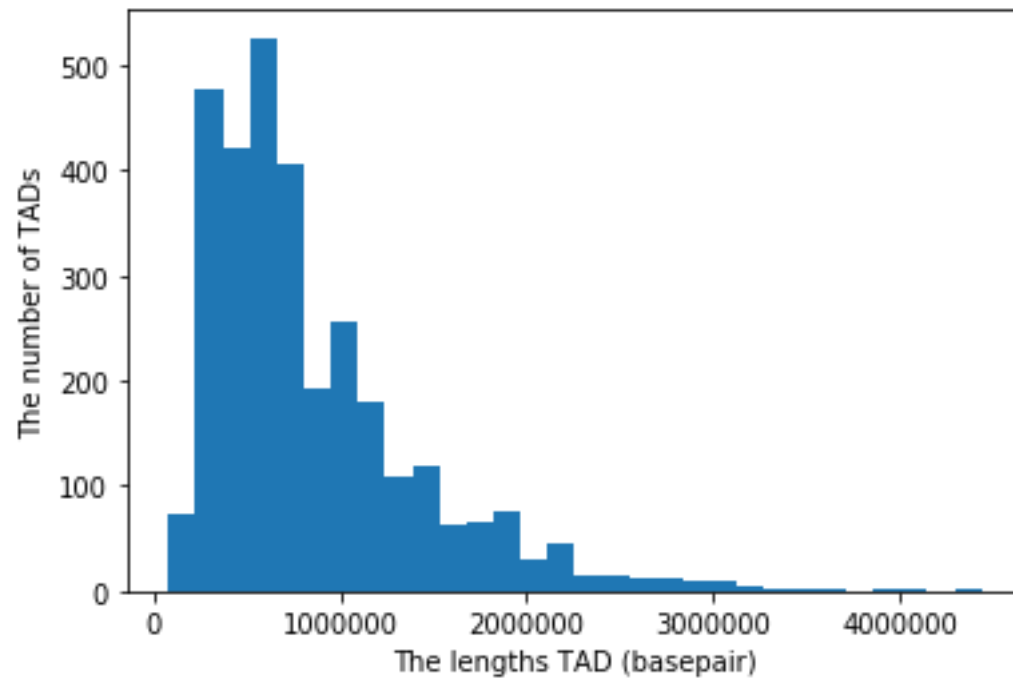

Supplementary Figure S2 The histogram of the lengths of TADs of humans.

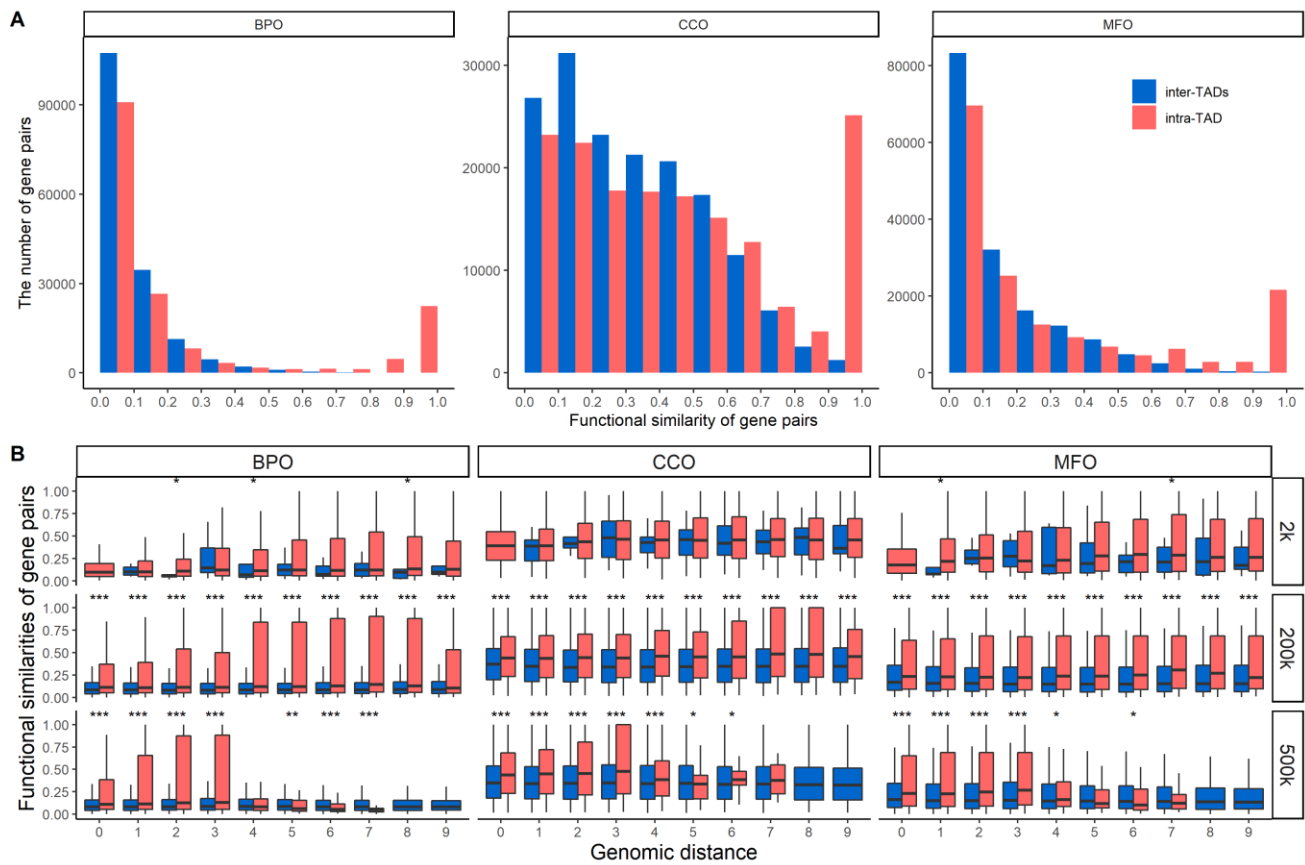

Supplementary Figure S3 Functional similarities of mouse gene pairs for intra- and inter-TADs without removing possible duplicate genes. Supplementary Figure S3A depicts the histograms of functional similarities of gene pairs in BPO, CCO, and MFO. Supplementary Figure S3B shows the functional similarities of gene pairs from a range of genomic distances: bin sizes of 2 kbp, 200 kbp, and 500 kbp. For example, when bin size equals 2 kbp, bin 0 indicates that the genomic distance of the gene pairs is less than 2 kbp. \*\*\* indicates that the p-value of the Wilcoxon test is less than 0.0001, \*\* indicates that the p-value is between 0.0001 and 0.001, and \* indicates that the p-value is between 0.001 and 0.05.

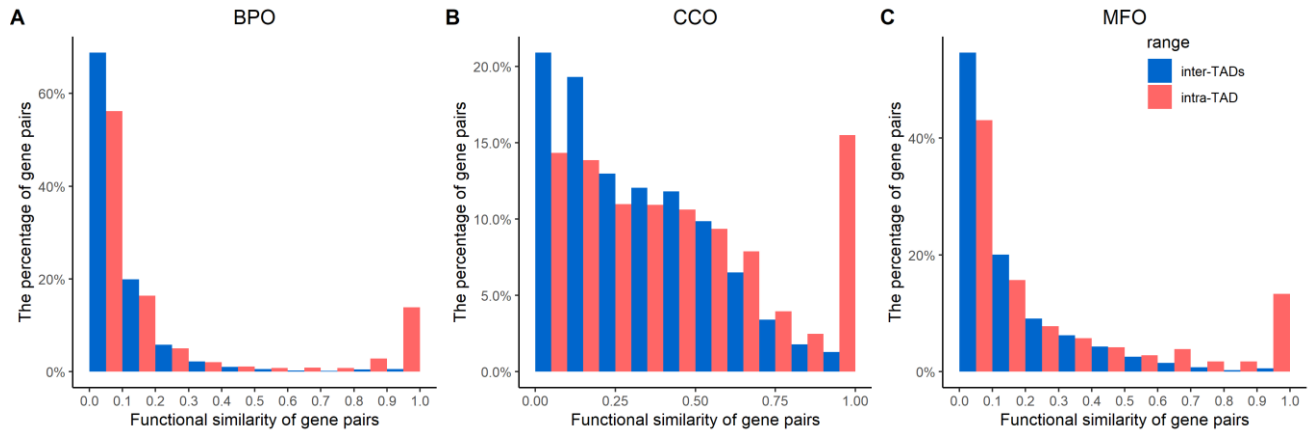

Supplementary Figure S4 Functional similarities of all possible mouse gene pairs for intra- and inter-TADs on the same chromosome. The histograms of functional similarities of gene pairs were calculated in BPO, CCO, and MFO. The Y-axis uses a percentage scale.

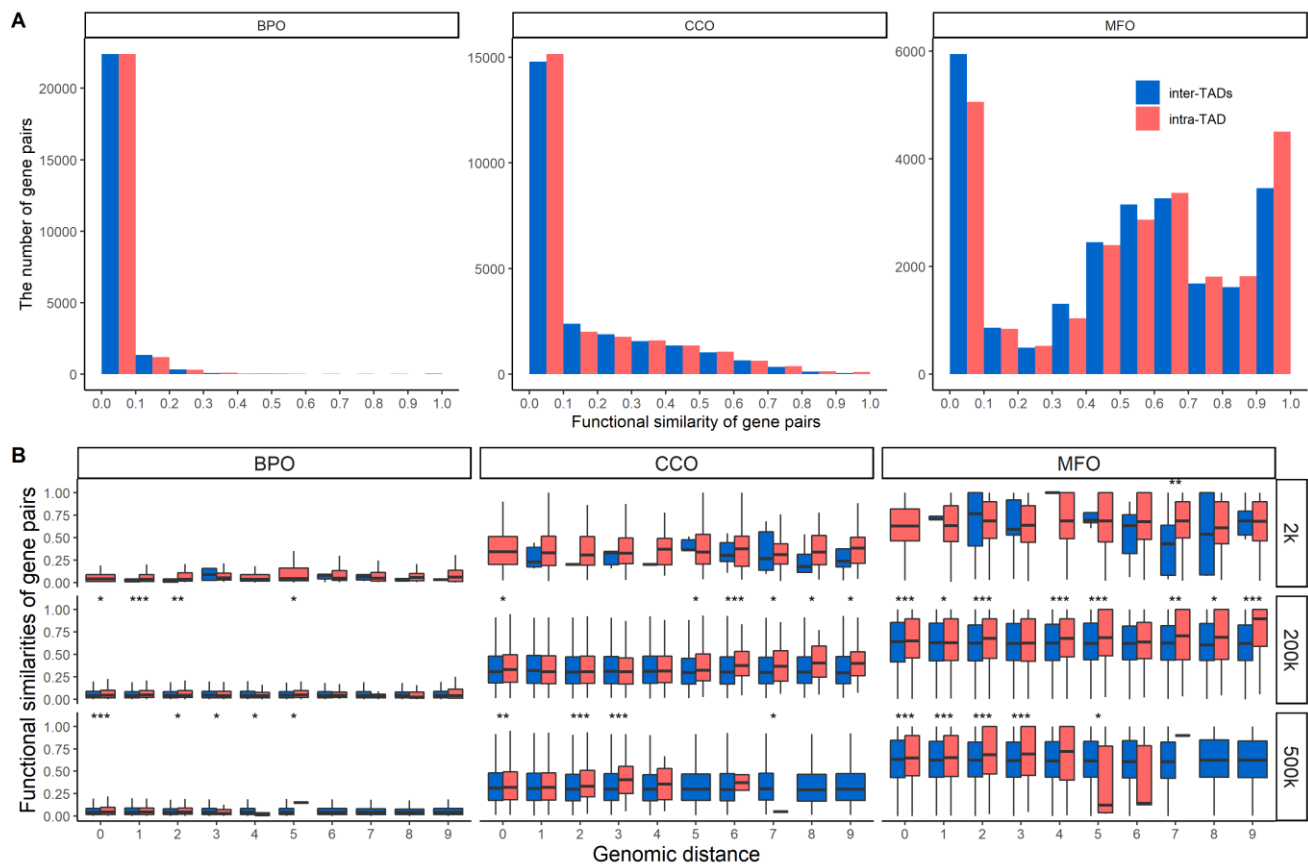

Supplementary Figure S5 Functional similarities of human gene pairs for intra- and inter-TADs removing possible duplicate genes. Supplementary Figure S5A depicts the histograms of functional similarities of gene pairs in BPO, CCO, and MFO. Supplementary Figure S5B shows the functional similarities of gene pairs from a range of genomic distances: bin sizes of 2 kbp, 200 kbp, and 500 kbp. For example, when bin size equals 2 kbp, bin 0 indicates that the genomic distance of the gene pairs is less than 2 kbp. \*\*\* indicates that the p-value of the Wilcoxon test is less than 0.0001, \*\* indicates that the p-value is between 0.0001 and 0.001, and \* indicates that the p-value is between 0.001 and 0.05.

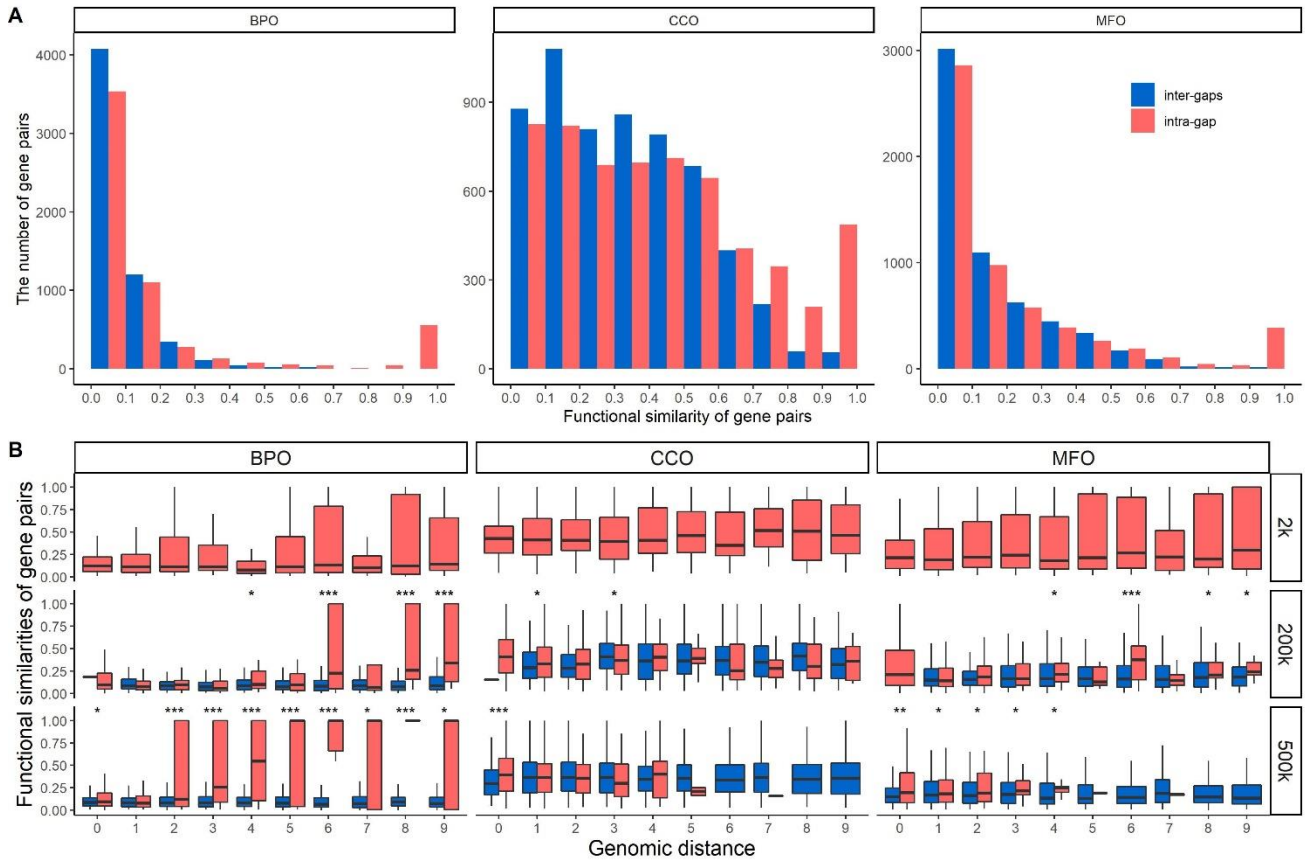

Supplementary Figure S6 Functional similarities of mouse gene pairs for intra- and inter-gaps without removing possible duplicate genes. Supplementary Figure S6A depicts the histograms of functional similarities of gene pairs in BPO, CCO, and MFO. Supplementary Figure S6B shows the functional similarities of gene pairs from a range of genomic distances: bin sizes of 2 kbp, 200 kbp, and 500 kbp. For example, when bin size equals 2 kbp, bin 0 indicates that the genomic distance of the gene pairs is less than 2 kbp. \*\*\* indicates that the p-value of the Wilcoxon test is less than 0.0001, \*\* indicates that the p-value is between 0.0001 and 0.001, and \* indicates that the p-value is between 0.001 and 0.05.

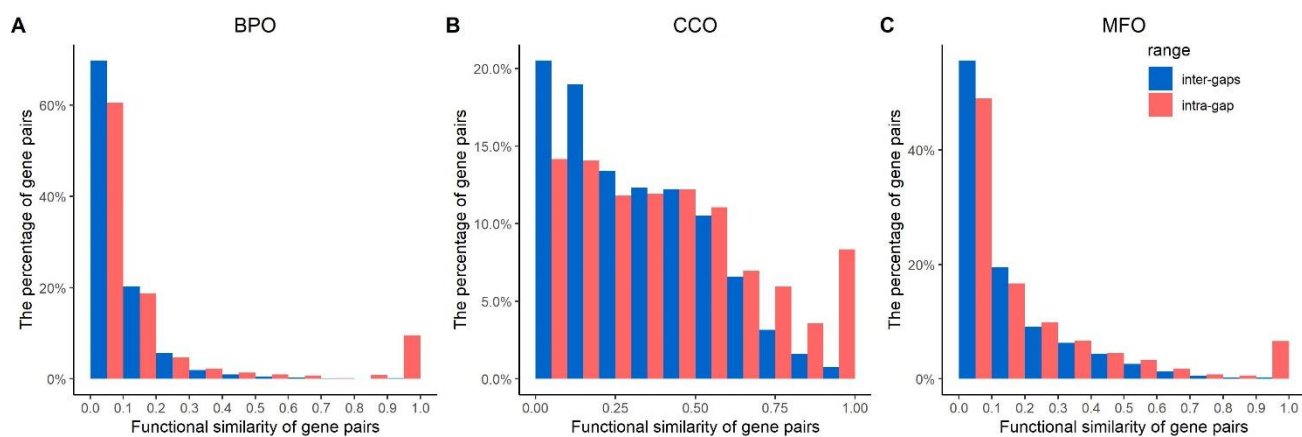

Supplementary Figure S7 The histograms of percentages of all possible mouse gene pairs for intra- and inter-gaps on the same chromosome. The histograms of functional similarities of gene pairs were calculated in BPO, CCO, and MFO. The Y-axis uses a percentage scale.

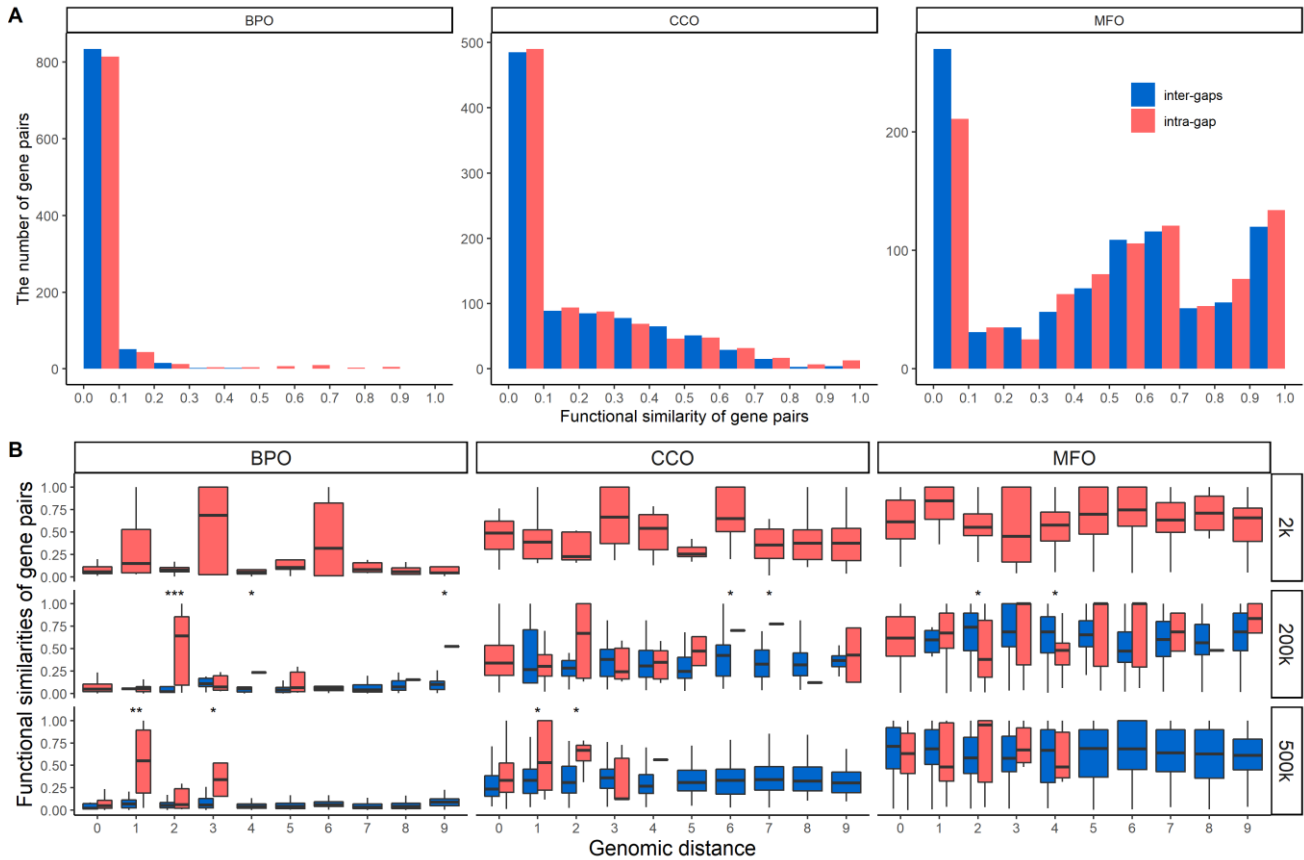

Supplementary Figure S8 Functional similarities of human gene pairs for intra- and inter-gaps removing possible duplicate genes. Supplementary Figure S8A depicts the histograms of functional similarities of gene pairs in BPO, CCO, and MFO. Supplementary Figure S8B shows the functional similarities of gene pairs from a range of genomic distances: bin sizes of 2 kbp, 200 kbp, and 500 kbp. For example, when bin size equals 2 kbp, bin 0 indicates that the genomic distance of the gene pairs is less than 2 kbp. \*\*\* indicates that the p-value of the Wilcoxon test is less than 0.0001, \*\* indicates that the p-value is between 0.0001 and 0.001, and \* indicates that the p-value is between 0.001 and 0.05.



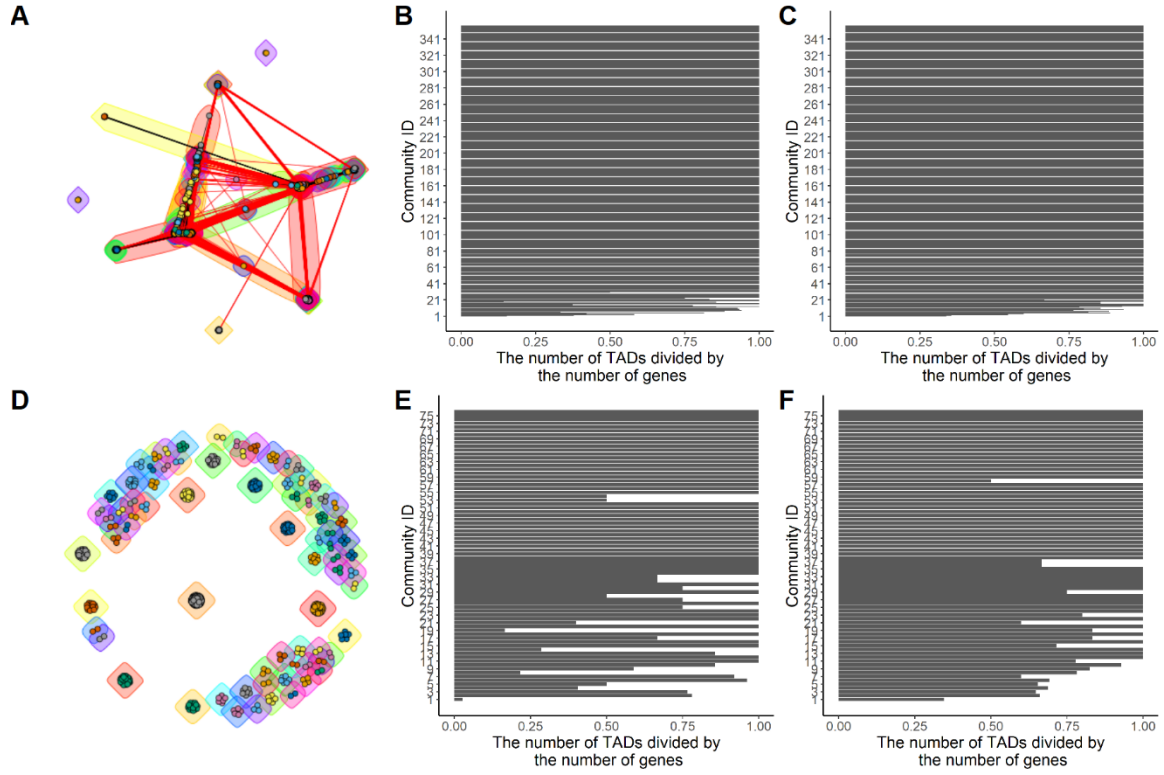

Supplementary Figure S9 The network communities for CCO FSNs of mouse chromosome 2. Figures A and D show the network communities with functional thresholds 0.7 and 1, respectively. Figures B and E show the distributions of the same-TAD-belonging ratios. Figures C and F show the distributions of the same-TAD-belonging ratios based on random communities.

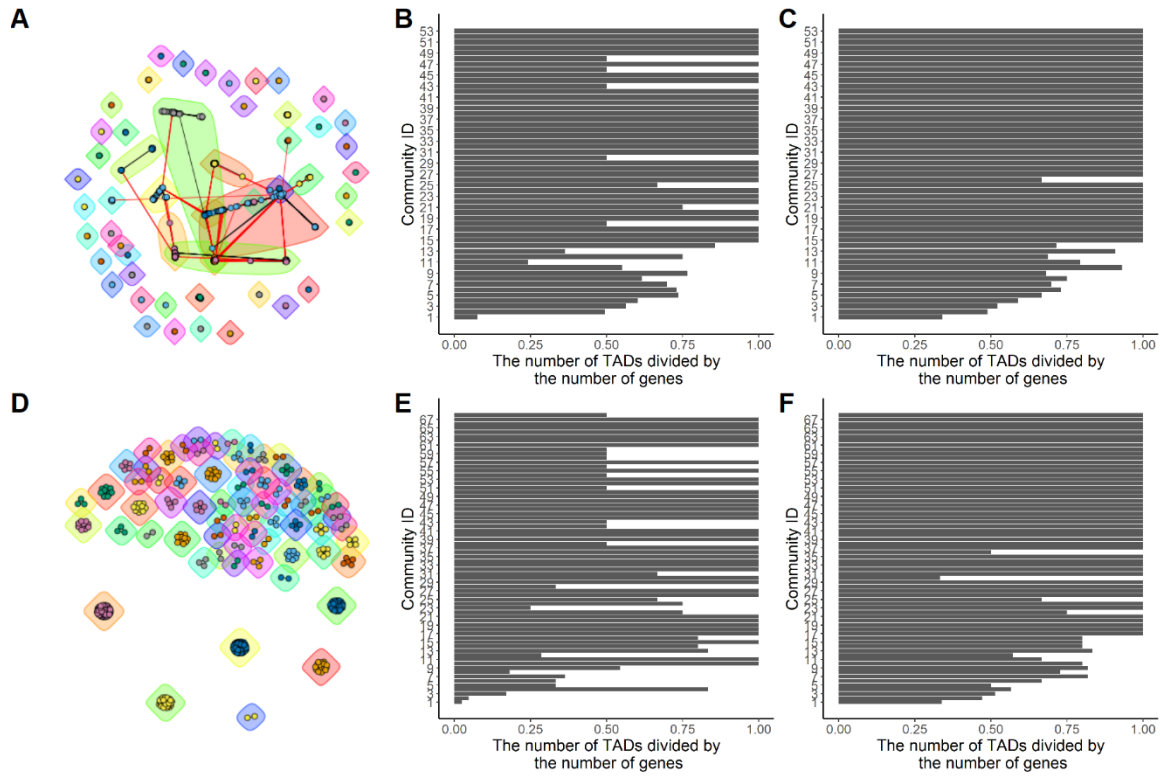

Supplementary Figure S10 The network communities for MFO FSNs of mouse chromosome 2. Figures A and D show the network communities with functional thresholds 0.7 and 1, respectively. Figures B and E show the distributions of the same-TAD-belonging ratios. Figures C and F show the distributions of the same-TAD-belonging ratios based on random communities.

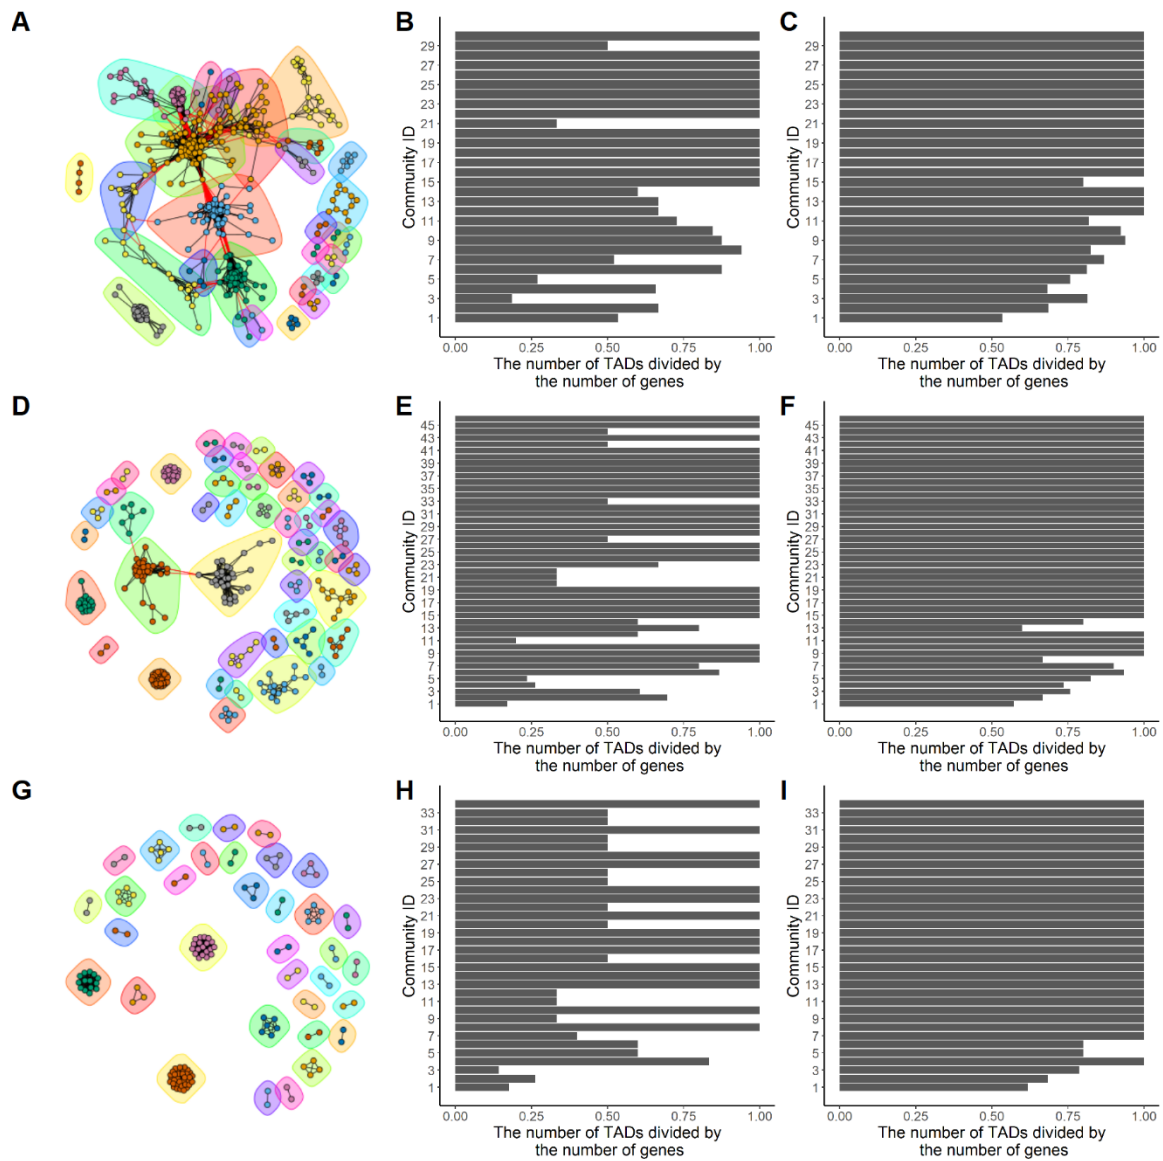

Supplementary Figure S11 The network communities for BPO FSNs of the mouse X-chromosome. Figures A, D, and G show the network communities with functional thresholds 0.5, 0.7, and 1, respectively. Figures B, E, and H show the distributions of the same-TAD-belonging ratios. Figures C, F, and I show the distributions of the same-TAD-belonging ratios based on random communities.

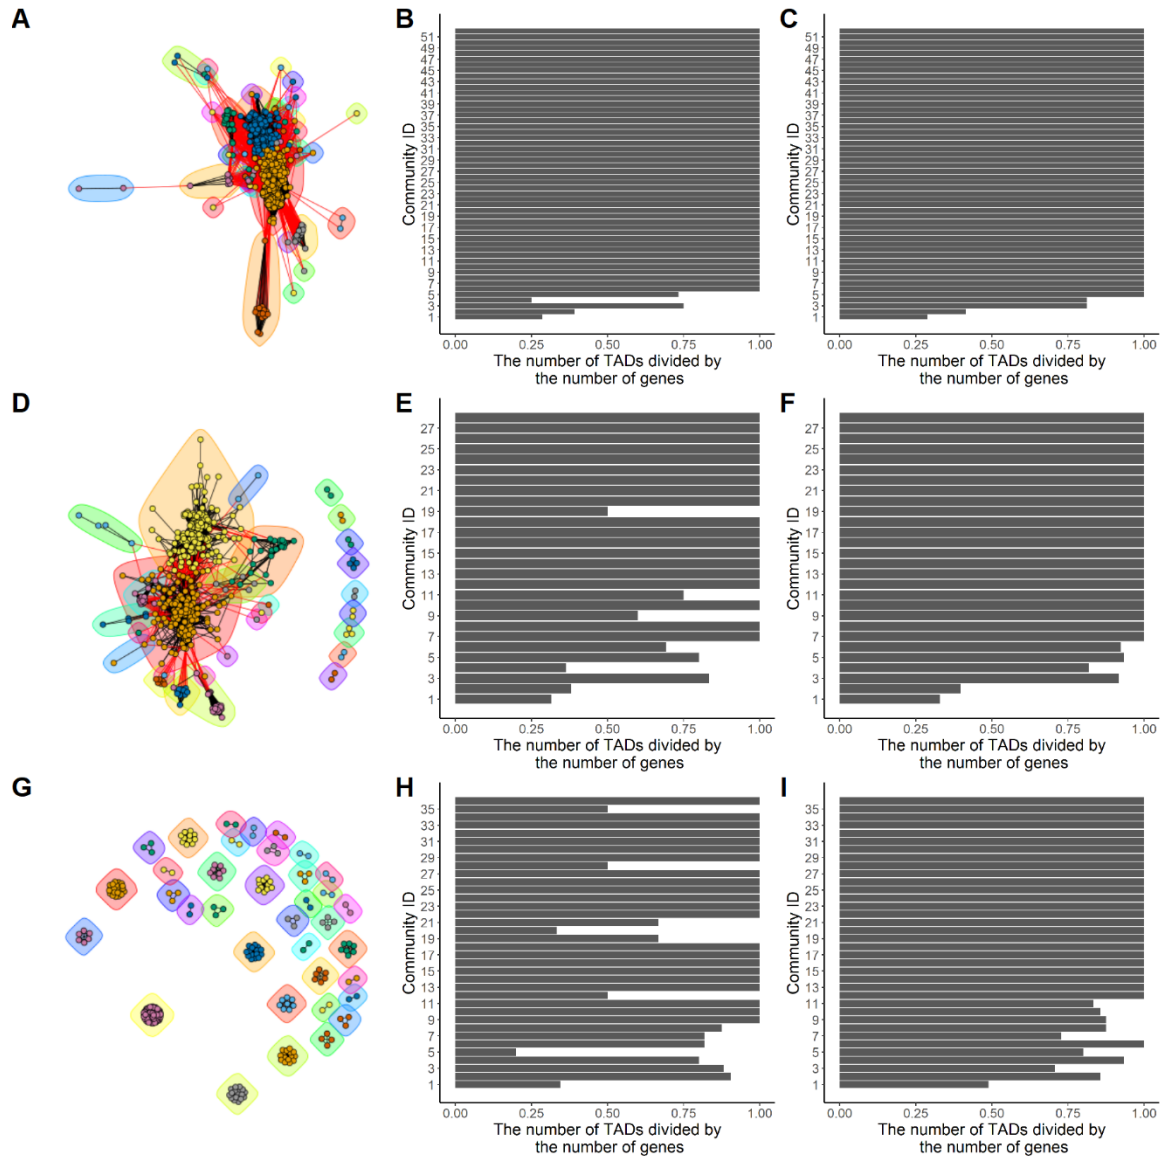

Supplementary Figure S12 The network communities for CCO FSNs of the mouse X-chromosome. Figures A, D, and G show the network communities with functional thresholds 0.5, 0.7, and 1, respectively. Figures B, E, and H show the distributions of the same-TAD-belonging ratios. Figures C, F, and I show the distributions of the same-TAD-belonging ratios based on random communities.

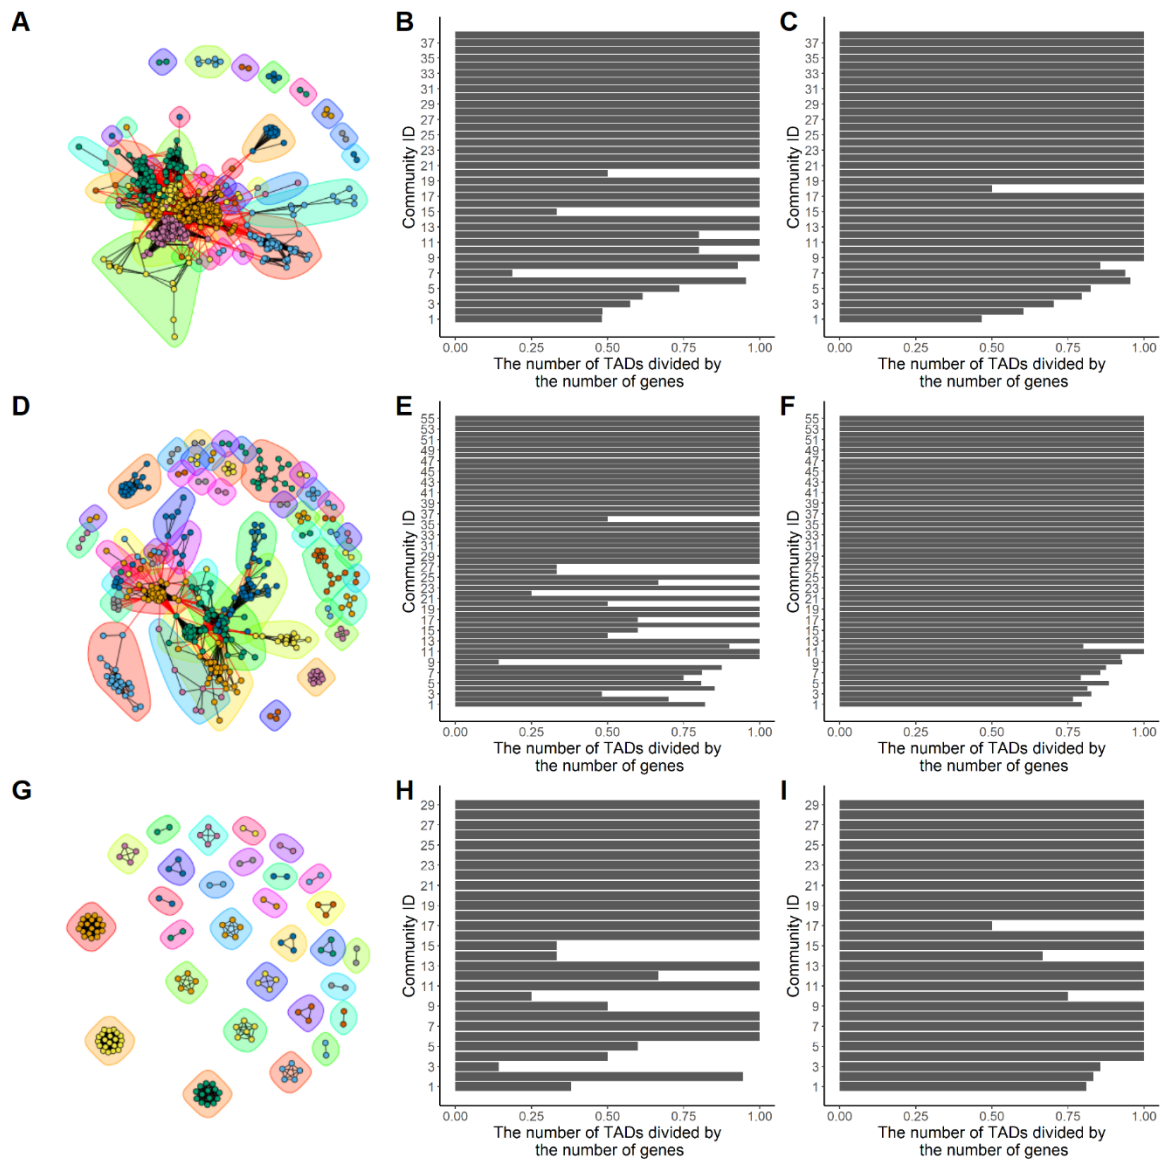

Supplementary Figure S13 The network communities for MFO FSNs of the mouse X-chromosome. Figures A, D, and G show the network communities with functional thresholds 0.5, 0.7, and 1, respectively. Figures B, E, and H show the distributions of the same-TAD-belonging ratios. Figures C, F, and I show the distributions of the same-TAD-belonging ratios based on random communities.

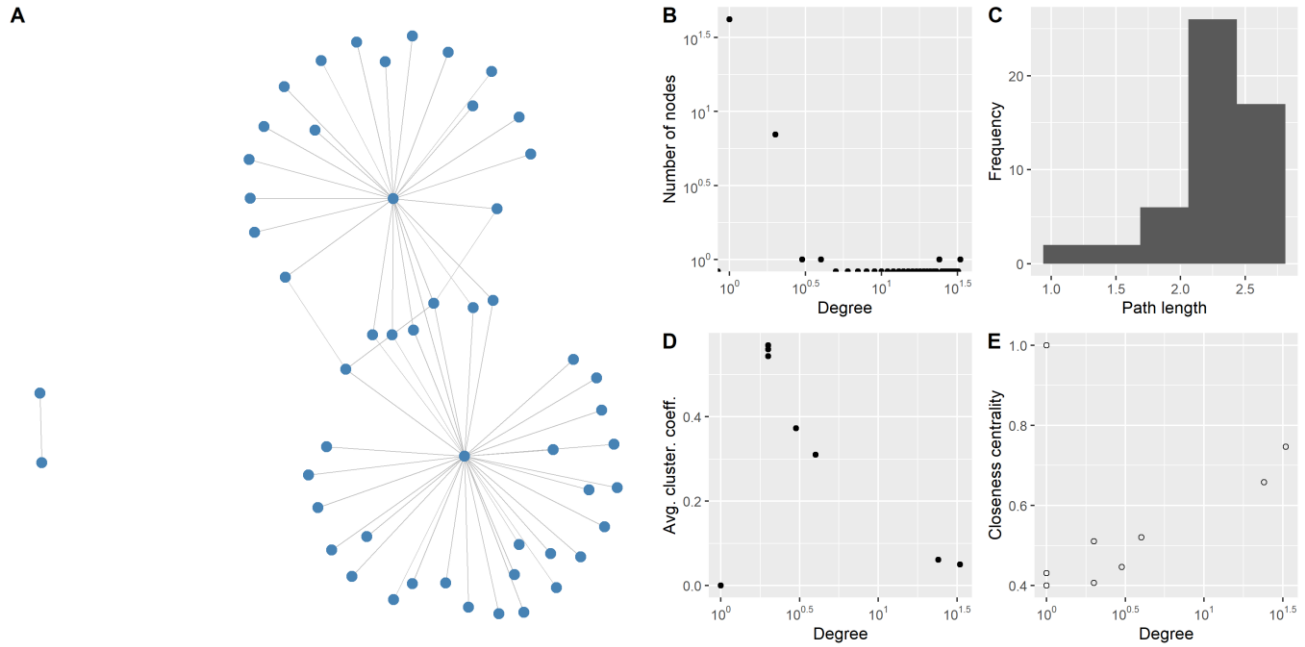

Supplementary Figure S14 The HiC-GGSI network and topological properties of the mouse X-chromosome with the Hi-C threshold: 800 and the distance threshold: 2 Mbp. Figure A represents the HiC-GGSI network. Figures B, C, D, and E represent the distributions of node degree, the average shortest path length, average cluster coefficient, and closeness centrality, respectively.

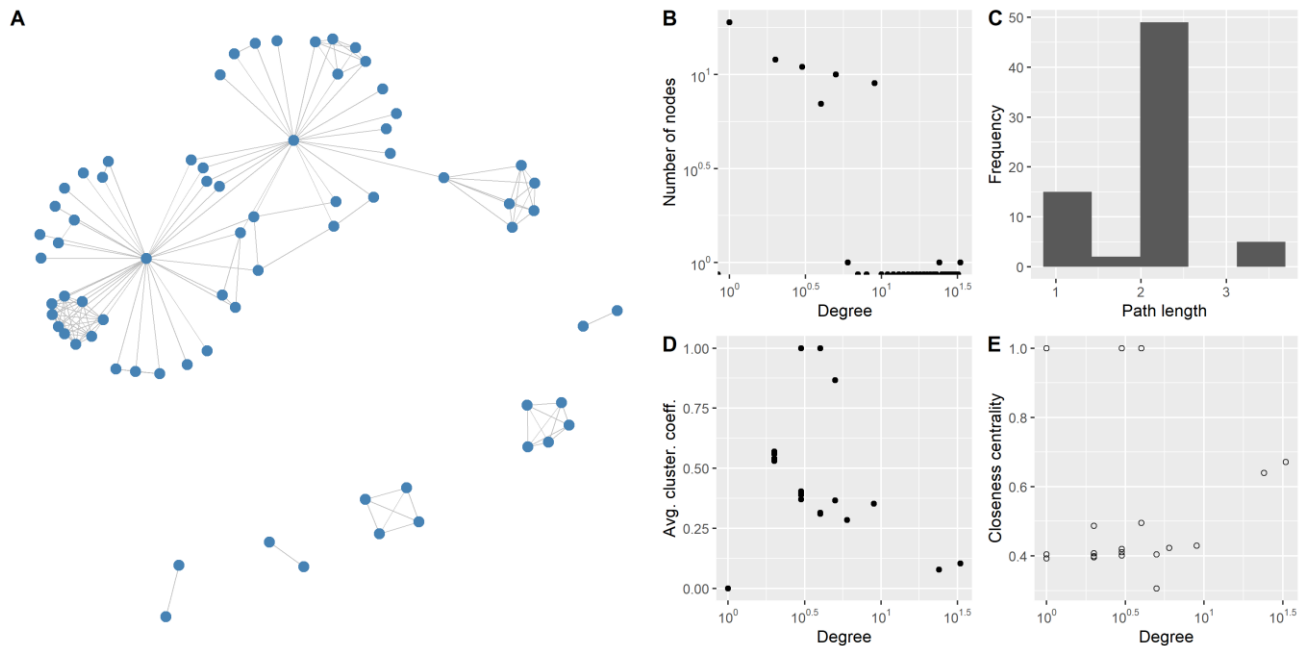

Supplementary Figure S15 The HiC-TAD-GGSI network and topological properties of the mouse X-chromosome with the Hi-C threshold: 800 and the distance threshold: 2 Mbp. Figure A represents the HiC-TAD-GGSI network. Figures B, C, D, and E represent the distributions of node degree, the average shortest path length, average cluster coefficient, and closeness centrality, respectively.

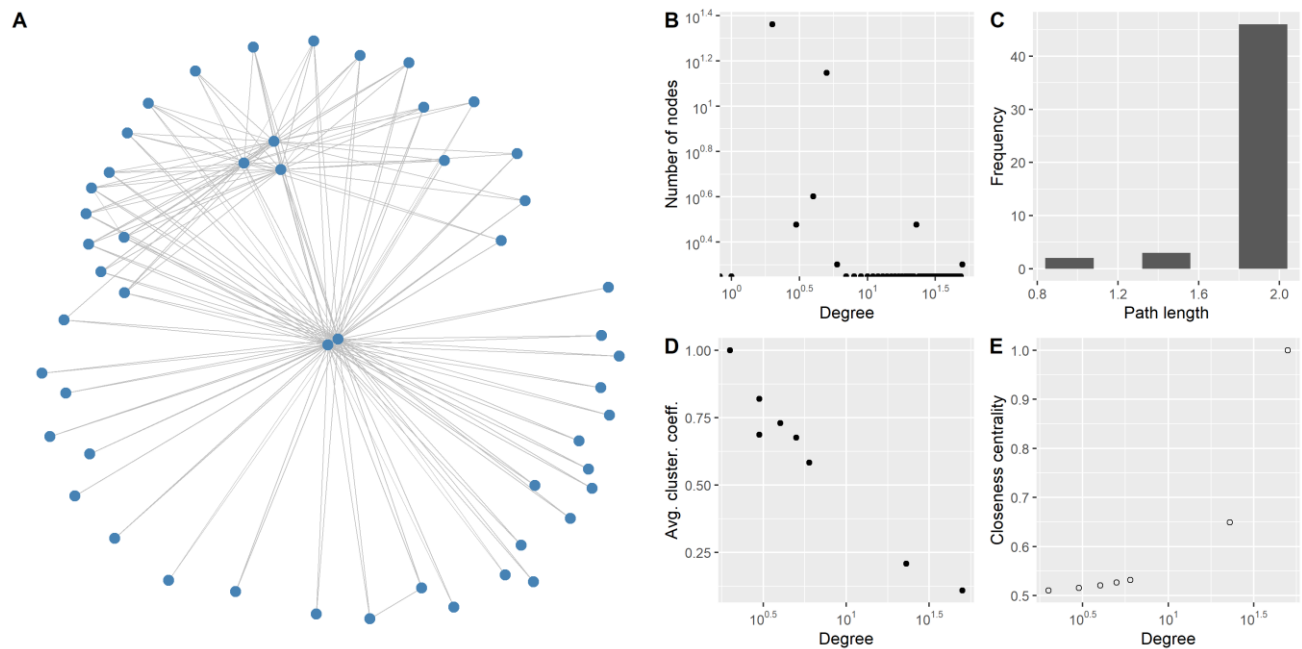

Supplementary Figure S16 The reconstructed HiC-GGSI network and topological properties of the mouse X-chromosome with the Hi-C threshold: 800, the distance threshold: 2 Mbp, and the autoencoder confidence score threshold: 0.6. Figure A represents the imputed HiC-GGSI network. Figures B, C, D, and E represent the distributions of node degree, the average shortest path length, average cluster coefficient, and closeness centrality, respectively.

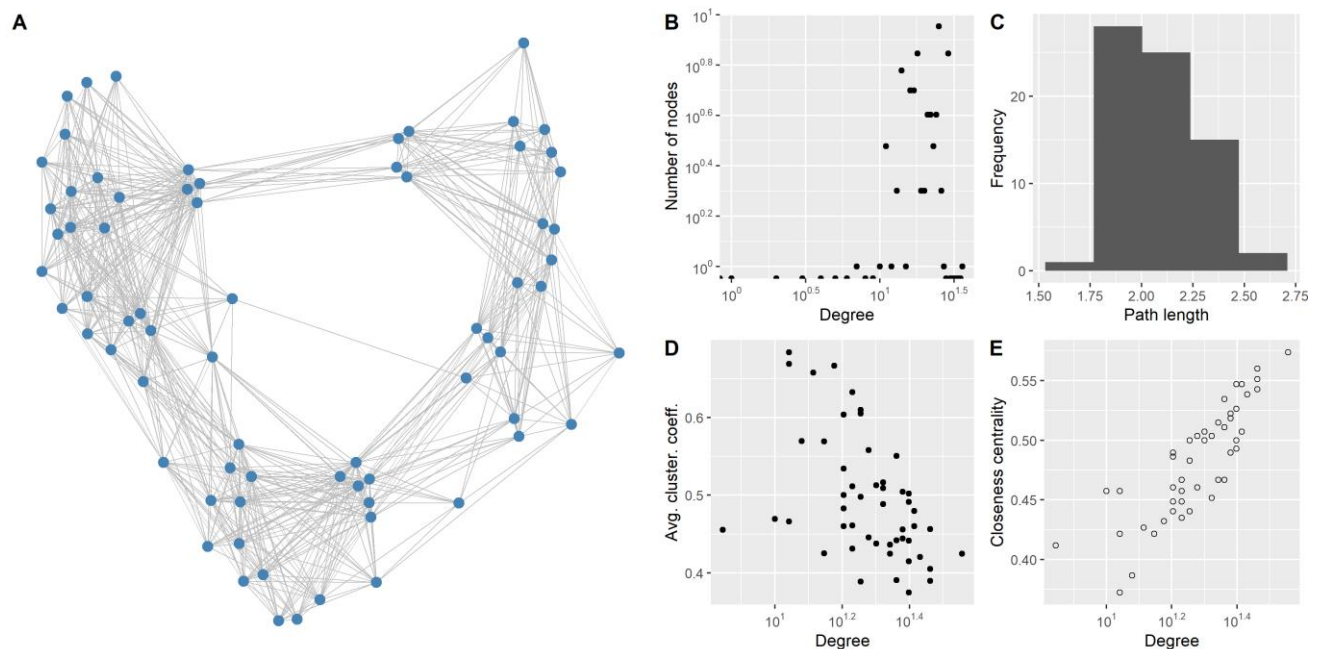

Supplementary Figure S17 The reconstructed HiC-TAD-GGSI network and topological properties of the mouse X-chromosome with the Hi-C threshold: 800, the distance threshold: 2 Mbp, and the autoencoder confidence score threshold: 0.6. Figure A represents the imputed HiC-TAD-GGSI

network. Figures B, C, D, and E represent the distributions of node degree, the average shortest path length, average cluster coefficient, and closeness centrality, respectively.



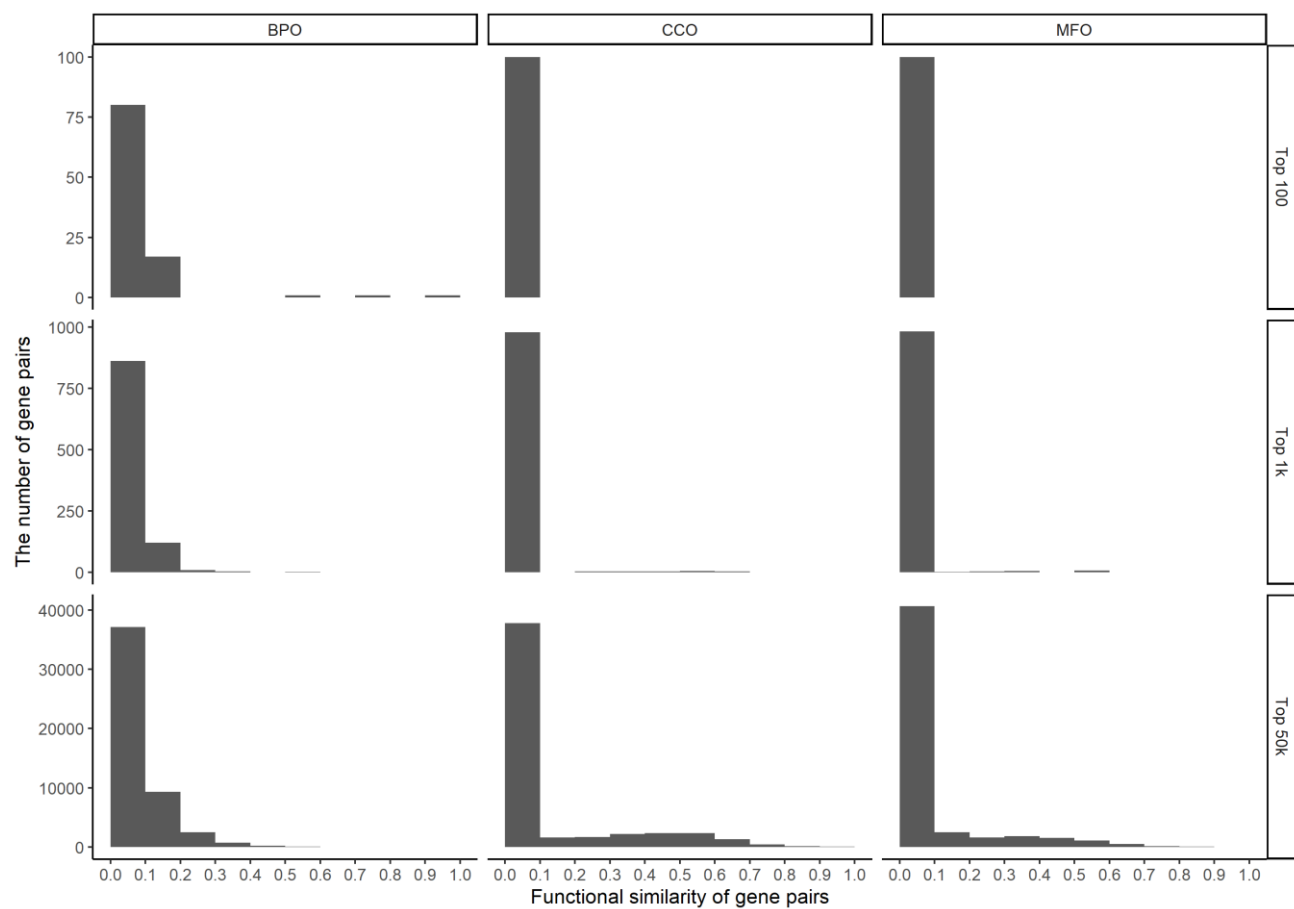

Supplementary Figure S18 Functional similarities of highly interactive mouse gene pairs from different chromosomes. The histograms of functional similarities of the gene pairs were calculated in BPO, CCO, and MFO. The gene pairs were sorted by the Hi-C inter-chromosome raw contacts. We plotted the histograms for the top 100, 1k, and 50k interactive gene pairs.

## 2 Supplementary Tables

Supplementary Table S1 The top 20 enriched gene functions associated with the high functional similarities ( $\geq 0.9$ ) of intra-TADs gene pairs of humans and mice in BPO. The conserved gene functions across humans and mice are marked in bold.

| Enriched gene functions of humans                                                                 | Enriched gene functions of mice                      |
|---------------------------------------------------------------------------------------------------|------------------------------------------------------|
| <b>detection of chemical stimulus involved in sensory perception of bitter taste (GO:0001580)</b> | sensory perception of smell (GO:0007608)             |
| sensory perception of bitter taste (GO:0050913)                                                   | xenobiotic glucuronidation (GO:0052697)              |
| detection of chemical stimulus involved in sensory perception of taste (GO:0050912)               | flavonoid glucuronidation (GO:0052696)               |
| antibacterial humoral response (GO:0019731)                                                       | sensory perception of chemical stimulus (GO:0007606) |
| sensory perception of taste (GO:0050909)                                                          | cellular glucuronidation (GO:0052695)                |
| antimicrobial humoral response (GO:0019730)                                                       | flavonoid metabolic process (GO:0009812)             |
| cellular process (GO:0009987)                                                                     | response to pheromone (GO:0019236)                   |
| biological regulation (GO:0065007)                                                                | uronic acid metabolic process (GO:0006063)           |
| regulation of biological process (GO:0050789)                                                     | glucuronate metabolic process (GO:0019585)           |
| regulation of cellular process (GO:0050794)                                                       | sensory perception (GO:0007600)                      |
| localization (GO:0051179)                                                                         | response to corticosterone (GO:0051412)              |

|                                                                        |                                                                                                   |
|------------------------------------------------------------------------|---------------------------------------------------------------------------------------------------|
| regulation of metabolic process (GO:0019222)                           | G protein-coupled receptor signaling pathway (GO:0007186)                                         |
| developmental process (GO:0032502)                                     | nervous system process (GO:0050877)                                                               |
| regulation of macromolecule metabolic process (GO:0060255)             | complement receptor mediated signaling pathway (GO:0002430)                                       |
| regulation of cellular metabolic process (GO:0031323)                  | detection of chemical stimulus involved in sensory perception of smell (GO:0050911)               |
| regulation of nitrogen compound metabolic process (GO:0051171)         | detection of chemical stimulus involved in sensory perception (GO:0050907)                        |
| anatomical structure development (GO:0048856)                          | granzyme-mediated programmed cell death signaling pathway (GO:0140507)                            |
| regulation of primary metabolic process (GO:0080090)                   | cytolysis (GO:0019835)                                                                            |
| regulation of cellular macromolecule biosynthetic process (GO:2000112) | system process (GO:0003008)                                                                       |
| regulation of macromolecule biosynthetic process (GO:0010556)          | <b>detection of chemical stimulus involved in sensory perception of bitter taste (GO:0001580)</b> |

Supplementary Table S2 The top 20 enriched gene functions associated with the high functional similarities ( $\geq 0.9$ ) of intra-TADs gene pairs of humans and mice in CCO. The conserved gene functions across humans and mice are marked in bold.

| Enriched gene functions of humans                     | Enriched gene functions of mice                     |
|-------------------------------------------------------|-----------------------------------------------------|
| <b>chromatin (GO:0000785)</b>                         | CENP-A containing nucleosome (GO:0043505)           |
| nucleoplasm (GO:0005654)                              | CENP-A containing chromatin (GO:0061638)            |
| nuclear lumen (GO:0031981)                            | chromosome, centromeric core domain (GO:0034506)    |
| chromosome (GO:0005694)                               | cytolytic granule (GO:0044194)                      |
| organelle lumen (GO:0043233)                          | MHC class Ib protein complex (GO:0032398)           |
| intracellular organelle lumen (GO:0070013)            | nucleosome (GO:0000786)                             |
| membrane-enclosed lumen (GO:0031974)                  | DNA packaging complex (GO:0044815)                  |
| nucleus (GO:0005634)                                  | <b>integral component of membrane (GO:0016021)</b>  |
| intracellular membrane-bounded organelle (GO:0043231) | <b>intrinsic component of membrane (GO:0031224)</b> |
| membrane-bounded organelle (GO:0043227)               | <b>membrane (GO:0016020)</b>                        |
| intracellular organelle (GO:0043229)                  | <b>cellular anatomical entity (GO:0110165)</b>      |
| organelle (GO:0043226)                                | plasma membrane (GO:0005886)                        |
| intracellular anatomical structure (GO:0005622)       | extracellular space (GO:0005615)                    |
| <b>cellular anatomical entity (GO:0110165)</b>        | cell periphery (GO:0071944)                         |

|                                                      |                                               |
|------------------------------------------------------|-----------------------------------------------|
| <b>membrane (GO:0016020)</b>                         | extracellular region (GO:0005576)             |
| cell periphery (GO:0071944)                          | external side of plasma membrane (GO:0009897) |
| <b>intrinsic component of membrane (GO:0031224)</b>  | lytic vacuole (GO:0000323)                    |
| <b>integral component of membrane (GO:0016021)</b>   | lysosome (GO:0005764)                         |
| organelle membrane (GO:0031090)                      | <b>chromatin (GO:0000785)</b>                 |
| plasma membrane bounded cell projection (GO:0120025) | side of membrane (GO:0098552)                 |

Supplementary Table S3 The top 20 enriched gene functions associated with the high functional similarities ( $\geq 0.9$ ) of intra-TADs gene pairs of humans and mice in MFO. The conserved gene functions across humans and mice are marked in bold.

| Enriched gene functions of humans                       | Enriched gene functions of mice                  |
|---------------------------------------------------------|--------------------------------------------------|
| <b>bitter taste receptor activity (GO:0033038)</b>      | cholesterol dehydrogenase activity (GO:0102294)  |
| protein binding (GO:0005515)                            | palmitoyl-CoA 9-desaturase activity (GO:0032896) |
| binding (GO:0005488)                                    | olfactory receptor activity (GO:0004984)         |
| molecular_function (GO:0003674)                         | odorant binding (GO:0005549)                     |
| heterocyclic compound binding (GO:1901363)              | CCR1 chemokine receptor binding (GO:0031726)     |
| cation binding (GO:0043169)                             | pheromone receptor activity (GO:0016503)         |
| organic cyclic compound binding (GO:0097159)            | pheromone binding (GO:0005550)                   |
| ion binding (GO:0043167)                                | trace-amine receptor activity (GO:0001594)       |
| hydrolase activity (GO:0016787)                         | TAP2 binding (GO:0046979)                        |
| catalytic activity (GO:0003824)                         | TAP1 binding (GO:0046978)                        |
| purine ribonucleoside triphosphate binding (GO:0035639) | TAP binding (GO:0046977)                         |
| purine nucleotide binding (GO:0017076)                  | anandamide 11,12 epoxidase activity (GO:0062188) |

|                                                         |                                                                                                                 |
|---------------------------------------------------------|-----------------------------------------------------------------------------------------------------------------|
| purine ribonucleotide binding<br>(GO:0032555)           | anandamide 8,9 epoxidase activity<br>(GO:0062187)                                                               |
| carbohydrate derivative binding<br>(GO:0097367)         | <b>bitter taste receptor activity<br/>(GO:0033038)</b>                                                          |
| ribonucleotide binding (GO:0032553)                     | caffeine oxidase activity (GO:0034875)                                                                          |
| small molecule binding (GO:0036094)                     | oxidoreductase activity, acting on CH or<br>CH2 groups, quinone or similar<br>compound as acceptor (GO:0033695) |
| catalytic activity, acting on a protein<br>(GO:0140096) | CD8 receptor binding (GO:0042610)                                                                               |
| nucleotide binding (GO:0000166)                         | natural killer cell lectin-like receptor<br>binding (GO:0046703)                                                |
| nucleoside phosphate binding<br>(GO:1901265)            | transmembrane signaling receptor<br>activity (GO:0004888)                                                       |
| cytoskeletal protein binding<br>(GO:0008092)            | anandamide 14,15 epoxidase activity<br>(GO:0062189)                                                             |

Supplementary Table S4 GO term enrichment analysis for gene pairs with high expression similarities. Gene pairs that have both the means of normalized expression counts >1000 and expression similarity scores >0.95 were used to generate this table. We did not find enriched GO terms for the genes from the intra-gap regions.

| Genes observed from | Gene ontology | GO term name                                                                          | Expected | Fold enrichment | Raw p-value |
|---------------------|---------------|---------------------------------------------------------------------------------------|----------|-----------------|-------------|
| Inter-TADs          | BPO           | negative regulation of calcium ion export across plasma membrane (GO:1905913)         | 0.02     | 92.78           | 6.70E-04    |
|                     |               | positive regulation of stress granule assembly (GO:0062029)                           | 0.02     | 92.78           | 6.70E-04    |
|                     |               | positive regulation of telomerase RNA localization to Cajal body (GO:1904874)         | 0.04     | 69.58           | 4.06E-05    |
|                     | MFO           | N-terminal myristoylation domain binding (GO:0031997)                                 | 0.03     | 92.78           | 2.34E-05    |
|                     |               | adenylate cyclase activator activity (GO:0010856)                                     | 0.05     | 55.67           | 6.45E-05    |
|                     |               | protein phosphatase activator activity (GO:0072542)                                   | 0.13     | 30.93           | 2.07E-05    |
|                     | CCO           | proteasome storage granule (GO:0034515)                                               | 0.02     | 92.78           | 6.70E-04    |
|                     |               | box H/ACA telomerase RNP complex (GO:0090661)                                         | 0.04     | 46.39           | 1.65E-03    |
|                     |               | proteasome core complex, alpha-subunit complex (GO:0019773)                           | 0.09     | 46.39           | 5.84E-06    |
| Inter-gaps          | BPO           | positive regulation of establishment of protein localization to telomere (GO:1904851) | 0.02     | >100            | 9.52E-07    |
|                     |               | positive regulation of telomere maintenance via telomerase (GO:0032212)               | 0.05     | 60.63           | 2.13E-05    |
|                     |               | toxin transport (GO:1901998)                                                          | 0.07     | 43.11           | 5.55E-05    |
|                     | MFO           | protein folding chaperone (GO:0044183)                                                | 0.06     | 53.89           | 2.96E-05    |
|                     |               | RNA binding (GO:0003723)                                                              | 1.75     | 7.41            | 6.46E-09    |



|            |     |                                                                  |      |       |          |
|------------|-----|------------------------------------------------------------------|------|-------|----------|
|            | CCO | chaperonin-containing T-complex (GO:0005832)                     | 0.02 | >100  | 3.51E-04 |
|            |     | zona pellucida receptor complex (GO:0002199)                     | 0.02 | >100  | 1.86E-06 |
|            |     | myelin sheath (GO:0043209)                                       | 0.33 | 15.04 | 2.09E-05 |
| Intra-TADs | BPO | de novo' IMP biosynthetic process (GO:0006189)                   | 0.02 | >100  | 2.59E-07 |
|            |     | de novo' AMP biosynthetic process (GO:0044208)                   | 0.04 | >100  | 2.55E-04 |
|            |     | ribosomal small subunit export from nucleus (GO:0000056)         | 0.04 | 67.86 | 2.42E-05 |
|            | MFO | ceramide binding (GO:0097001)                                    | 0.09 | 32.15 | 1.63E-04 |
|            |     | aminoacyl-tRNA ligase activity (GO:0004812)                      | 0.2  | 19.86 | 6.89E-05 |
|            |     | structural constituent of cytoskeleton (GO:0005200)              | 0.31 | 15.91 | 2.23E-05 |
|            | CCO | nucleoplasmic periphery of the nuclear pore complex (GO:1990826) | 0.01 | >100  | 1.41E-04 |
|            |     | PTW/PP1 phosphatase complex (GO:0072357)                         | 0.03 | 58.17 | 8.33E-04 |
|            |     | annulate lamellae (GO:0005642)                                   | 0.03 | 58.17 | 8.33E-04 |

Supplementary Tables S5 Mutual pathways for gene pairs with high expression similarities. Gene pairs that have both the means of normalized expression counts >1000 and expression similarity scores >0.95 were used to generate this table. We did not find any mutual pathway for the gene pairs from intra- and inter-gap regions.

| Genes observed from | Gene1       | Gene2       | Mutual pathways                          |
|---------------------|-------------|-------------|------------------------------------------|
| Inter-TADs          | MGI:107686  | MGI:1298388 | Metabolic pathways (mmu01100)            |
|                     | MGI:98890   | MGI:1913284 | Pathways of neurodegeneration (mmu05022) |
|                     | MGI:98890   | MGI:1913284 | Parkinson disease (mmu05012)             |
|                     | MGI:98890   | MGI:1920150 | Pathways of neurodegeneration (mmu05022) |
|                     | MGI:98890   | MGI:1920150 | Parkinson disease (mmu05012)             |
|                     | MGI:1913663 | MGI:107686  | Alzheimer disease (mmu05010)             |
|                     | MGI:1913663 | MGI:107686  | Pathways of neurodegeneration (mmu05022) |
|                     | MGI:1913663 | MGI:107686  | Prion disease (mmu05020)                 |
|                     | MGI:1913663 | MGI:107686  | Huntington disease (mmu05016)            |
|                     | MGI:1913663 | MGI:107686  | Amyotrophic lateral sclerosis (mmu05014) |
|                     | MGI:1913663 | MGI:107686  | Parkinson disease (mmu05012)             |
|                     | MGI:1913663 | MGI:107686  | Parkinson disease (mmu05012)             |
| Intra-TAD           | MGI:1351455 | MGI:1351329 | Ribosome (mmu03010)                      |
|                     | MGI:1351455 | MGI:1351329 | Coronavirus disease (mmu05171)           |
|                     | MGI:1914693 | MGI:88473   | Pathways of neurodegeneration (mmu05022) |
|                     | MGI:1914693 | MGI:88473   | Amyotrophic lateral sclerosis (mmu05014) |
|                     | MGI:97549   | MGI:104880  | Amyotrophic lateral sclerosis (mmu05014) |
|                     | MGI:98869   | MGI:1095409 | Phagosome (mmu04145)                     |
|                     | MGI:98869   | MGI:1095409 | Alzheimer disease (mmu05010)             |
|                     | MGI:98869   | MGI:1095409 | Prion disease (mmu05020)                 |
|                     | MGI:98869   | MGI:1095409 | Pathways of neurodegeneration (mmu05022) |
|                     | MGI:98869   | MGI:1095409 | Salmonella infection (mmu05132)          |
|                     | MGI:98869   | MGI:1095409 | Huntington disease (mmu05016)            |
|                     | MGI:98869   | MGI:1095409 | Gap junction (mmu04540)                  |
|                     | MGI:98869   | MGI:1095409 | Amyotrophic lateral sclerosis (mmu05014) |
|                     | MGI:98869   | MGI:1095409 | Parkinson disease (mmu05012)             |
|                     | MGI:98869   | MGI:1095409 | Tight junction (mmu04530)                |
|                     | MGI:98869   | MGI:1095409 | Apoptosis (mmu04210)                     |
|                     | MGI:107804  | MGI:1095409 | Phagosome (mmu04145)                     |

|  |            |             |                                                 |
|--|------------|-------------|-------------------------------------------------|
|  | MGI:107804 | MGI:1095409 | Alzheimer disease (mmu05010)                    |
|  | MGI:107804 | MGI:1095409 | Prion disease (mmu05020)                        |
|  | MGI:107804 | MGI:1095409 | Pathways of neurodegeneration (mmu05022)        |
|  | MGI:107804 | MGI:1095409 | Salmonella infection (mmu05132)                 |
|  | MGI:107804 | MGI:1095409 | Huntington disease (mmu05016)                   |
|  | MGI:107804 | MGI:1095409 | Gap junction (mmu04540)                         |
|  | MGI:107804 | MGI:1095409 | Amyotrophic lateral sclerosis (mmu05014)        |
|  | MGI:107804 | MGI:1095409 | Parkinson disease (mmu05012)                    |
|  | MGI:107804 | MGI:1095409 | Tight junction (mmu04530)                       |
|  | MGI:107804 | MGI:1095409 | Apoptosis (mmu04210)                            |
|  | MGI:107494 | MGI:1914518 | Focal adhesion (mmu04510)                       |
|  | MGI:107494 | MGI:1914518 | Axon guidance (mmu04360)                        |
|  | MGI:107494 | MGI:1914518 | Leukocyte transendothelial migration (mmu04670) |
|  | MGI:107494 | MGI:1914518 | Salmonella infection (mmu05132)                 |
|  | MGI:107494 | MGI:1914518 | Regulation of actin cytoskeleton (mmu04810)     |
|  | MGI:107494 | MGI:1914518 | Tight junction (mmu04530)                       |
|  | MGI:107494 | MGI:1914518 | Platelet activation (mmu04611)                  |

Supplementary Table S6 The performance of the graph autoencoder when it was used to reconstruct the HiC-GGSI and HiC-TAD-GGSI networks at different Hi-C contact and genomic distance thresholds on the chromosomes 2 of mice and humans and the chromosome 2A of chimpanzees. We calculated the 95% confidence interval with ten repeated experiments.

| Species    | Experimental settings                      |                                     |              | Number of genes in the network | The area under the curve (AUC) | Average precision (AP) |
|------------|--------------------------------------------|-------------------------------------|--------------|--------------------------------|--------------------------------|------------------------|
|            | Number of Hi-C contacts between gene pairs | Genomic distance between gene pairs | Network type |                                |                                |                        |
| Mouse      | $\geq 800$                                 | $\geq 1$ Mbp                        | HiC-GGSI     | 94                             | $0.76 \pm 0.074$               | $0.79 \pm 0.077$       |
|            |                                            |                                     | HiC-TAD-GGSI | 618                            | $1.0 \pm 0.0$                  | $1.0 \pm 0.0$          |
|            |                                            | $\geq 2$ Mbp                        | HiC-GGSI     | 57                             | $0.86 \pm 0.089$               | $0.91 \pm 0.055$       |
|            |                                            |                                     | HiC-TAD-GGSI | 113                            | $0.96 \pm 0.019$               | $0.97 \pm 0.013$       |
|            | $\geq 1200$                                | $\geq 1$ Mbp                        | HiC-GGSI     | 61                             | $0.7 \pm 0.165$                | $0.75 \pm 0.114$       |
|            |                                            |                                     | HiC-TAD-GGSI | 591                            | $1.0 \pm 0.001$                | $1.0 \pm 0.001$        |
|            |                                            | $\geq 2$ Mbp                        | HiC-GGSI     | 32                             | $0.86 \pm 0.187$               | $0.9 \pm 0.132$        |
|            |                                            |                                     | HiC-TAD-GGSI | 88                             | $0.98 \pm 0.012$               | $0.99 \pm 0.009$       |
| Human      | $\geq 5$                                   | $\geq 1$ Mbp                        | HiC-GGSI     | 191                            | $0.83 \pm 0.022$               | $0.87 \pm 0.021$       |
|            |                                            |                                     | HiC-TAD-GGSI | 200                            | $0.83 \pm 0.03$                | $0.87 \pm 0.024$       |
|            |                                            | $\geq 2$ Mbp                        | HiC-GGSI     | 165                            | $0.82 \pm 0.013$               | $0.86 \pm 0.011$       |
|            |                                            |                                     | HiC-TAD-GGSI | 167                            | $0.82 \pm 0.023$               | $0.85 \pm 0.029$       |
|            | $\geq 10$                                  | $\geq 1$ Mbp                        | HiC-GGSI     | 116                            | $0.76 \pm 0.049$               | $0.82 \pm 0.029$       |
|            |                                            |                                     | HiC-TAD-GGSI | 129                            | $0.83 \pm 0.047$               | $0.85 \pm 0.042$       |
|            |                                            | $\geq 2$ Mbp                        | HiC-GGSI     | 85                             | $0.69 \pm 0.062$               | $0.77 \pm 0.039$       |
|            |                                            |                                     | HiC-TAD-GGSI | 89                             | $0.77 \pm 0.052$               | $0.81 \pm 0.062$       |
| Chimpanzee | $\geq 30$                                  | $\geq 1.5$ Mbp                      | HiC-GGSI     | 150                            | $0.83 \pm 0.035$               | $0.86 \pm 0.026$       |
|            |                                            |                                     | HiC-TAD-GGSI | 161                            | $0.86 \pm 0.028$               | $0.9 \pm 0.019$        |

|  |           |                |              |     |                  |                  |
|--|-----------|----------------|--------------|-----|------------------|------------------|
|  |           | $\geq 2$ Mbp   | HiC-GGSI     | 132 | $0.85 \pm 0.04$  | $0.88 \pm 0.029$ |
|  |           |                | HiC-TAD-GGSI | 134 | $0.84 \pm 0.031$ | $0.88 \pm 0.025$ |
|  | $\geq 80$ | $\geq 1.5$ Mbp | HiC-GGSI     | 77  | $0.68 \pm 0.087$ | $0.74 \pm 0.08$  |
|  |           |                | HiC-TAD-GGSI | 89  | $0.78 \pm 0.062$ | $0.83 \pm 0.074$ |
|  |           | $\geq 2$ Mbp   | HiC-GGSI     | 66  | $0.69 \pm 0.077$ | $0.75 \pm 0.047$ |
|  |           |                | HiC-TAD-GGSI | 69  | $0.73 \pm 0.074$ | $0.79 \pm 0.072$ |

Supplementary Table S7 Performance of function prediction based on reconstructed networks on the chromosomes 2 of mice and humans and the chromosome 2A of chimpanzees. We applied a threshold value of 0.6 to the autoencoder confidence scores. We calculated the 95% confidence interval with ten repeated experiments.

| Species | Experimental settings                        |                                     |              | GO terms considered for evaluation | Average of the best functional similarity between true GO terms and the GO terms inferred from: |                       |                                              |
|---------|----------------------------------------------|-------------------------------------|--------------|------------------------------------|-------------------------------------------------------------------------------------------------|-----------------------|----------------------------------------------|
|         | Number of Hi-C contacts between n gene pairs | Genomic distance between gene pairs | Network type |                                    | original network                                                                                | reconstructed network | union of original and reconstructed networks |
| Mouse   | $\geq 800$                                   | $\geq 1$ Mbp                        | HiC-GGSI     | Top 1                              | 0.41 $\pm$ 0.0                                                                                  | 0.23 $\pm$ 0.097      | 0.42 $\pm$ 0.003                             |
|         |                                              |                                     |              | Top 4                              | 0.63 $\pm$ 0.0                                                                                  | 0.5 $\pm$ 0.184       | 0.64 $\pm$ 0.004                             |
|         |                                              |                                     | HiC-TAD-GGSI | Top 1                              | 0.69 $\pm$ 0.0                                                                                  | 0.7 $\pm$ 0.01        | 0.7 $\pm$ 0.009                              |
|         |                                              |                                     |              | Top 4                              | 0.87 $\pm$ 0.0                                                                                  | 0.91 $\pm$ 0.003      | 0.91 $\pm$ 0.003                             |
|         |                                              | $\geq 2$ Mbp                        | HiC-GGSI     | Top 1                              | 0.42 $\pm$ 0.0                                                                                  | 0.3 $\pm$ 0.152       | 0.43 $\pm$ 0.011                             |
|         |                                              |                                     |              | Top 4                              | 0.5 $\pm$ 0.0                                                                                   | 0.46 $\pm$ 0.251      | 0.52 $\pm$ 0.017                             |
|         |                                              |                                     | HiC-TAD-GGSI | Top 1                              | 0.53 $\pm$ 0.0                                                                                  | 0.6 $\pm$ 0.046       | 0.58 $\pm$ 0.036                             |
|         |                                              |                                     |              | Top 4                              | 0.7 $\pm$ 0.0                                                                                   | 0.85 $\pm$ 0.07       | 0.81 $\pm$ 0.067                             |
|         | $\geq 1200$                                  | $\geq 1$ Mbp                        | HiC-GGSI     | Top 1                              | 0.4 $\pm$ 0.0                                                                                   | 0.45 $\pm$ 0.129      | 0.45 $\pm$ 0.078                             |
|         |                                              |                                     |              | Top 4                              | 0.61 $\pm$ 0.0                                                                                  | 0.74 $\pm$ 0.065      | 0.66 $\pm$ 0.074                             |
|         |                                              |                                     | HiC-TAD-GGSI | Top 1                              | 0.7 $\pm$ 0.0                                                                                   | 0.69 $\pm$ 0.008      | 0.69 $\pm$ 0.007                             |
|         |                                              |                                     |              | Top 4                              | 0.88 $\pm$ 0.0                                                                                  | 0.9 $\pm$ 0.004       | 0.9 $\pm$ 0.007                              |
|         |                                              | $\geq 2$ Mbp                        | HiC-GGSI     | Top 1                              | 0.35 $\pm$ 0.0                                                                                  | 0.43 $\pm$ 0.112      | 0.37 $\pm$ 0.046                             |
|         |                                              |                                     |              | Top 4                              | 0.48 $\pm$ 0.0                                                                                  | 0.73 $\pm$ 0.115      | 0.52 $\pm$ 0.084                             |
|         |                                              |                                     | HiC-TAD-GGSI | Top 1                              | 0.53 $\pm$ 0.0                                                                                  | 0.58 $\pm$ 0.045      | 0.56 $\pm$ 0.031                             |
|         |                                              |                                     |              | Top 4                              | 0.72 $\pm$ 0.0                                                                                  | 0.82 $\pm$ 0.052      | 0.78 $\pm$ 0.044                             |
| Human   | $\geq 5$                                     | $\geq 1$ Mbp                        | HiC-GGSI     | Top 1                              | 0.61 $\pm$ 0.0                                                                                  | 0.79 $\pm$ 0.068      | 0.81 $\pm$ 0.039                             |
|         |                                              |                                     |              | Top 4                              | 0.81 $\pm$ 0.0                                                                                  | 0.89 $\pm$ 0.03       | 0.9 $\pm$ 0.009                              |

|            |           |                |              |       |                |                  |                  |
|------------|-----------|----------------|--------------|-------|----------------|------------------|------------------|
|            |           | $\geq 2$ Mbp   | HiC-TAD-GGSI | Top 1 | $0.66 \pm 0.0$ | $0.83 \pm 0.0$   | $0.83 \pm 0.0$   |
|            |           |                |              | Top 4 | $0.82 \pm 0.0$ | $0.91 \pm 0.0$   | $0.91 \pm 0.0$   |
|            |           |                | HiC-GGSI     | Top 1 | $0.64 \pm 0.0$ | $0.78 \pm 0.052$ | $0.77 \pm 0.072$ |
|            |           |                |              | Top 4 | $0.84 \pm 0.0$ | $0.89 \pm 0.016$ | $0.89 \pm 0.014$ |
|            |           |                | HiC-TAD-GGSI | Top 1 | $0.67 \pm 0.0$ | $0.82 \pm 0.0$   | $0.82 \pm 0.0$   |
|            |           |                |              | Top 4 | $0.85 \pm 0.0$ | $0.9 \pm 0.002$  | $0.9 \pm 0.002$  |
|            | $\geq 10$ | $\geq 1$ Mbp   | HiC-GGSI     | Top 1 | $0.54 \pm 0.0$ | $0.65 \pm 0.105$ | $0.67 \pm 0.254$ |
|            |           |                |              | Top 4 | $0.76 \pm 0.0$ | $0.81 \pm 0.04$  | $0.86 \pm 0.015$ |
|            |           |                | HiC-TAD-GGSI | Top 1 | $0.59 \pm 0.0$ | $0.82 \pm 0.0$   | $0.82 \pm 0.0$   |
|            |           |                |              | Top 4 | $0.79 \pm 0.0$ | $0.89 \pm 0.001$ | $0.89 \pm 0.001$ |
|            |           | $\geq 2$ Mbp   | HiC-GGSI     | Top 1 | $0.53 \pm 0.0$ | $0.73 \pm 0.055$ | $0.74 \pm 0.062$ |
|            |           |                |              | Top 4 | $0.78 \pm 0.0$ | $0.83 \pm 0.016$ | $0.84 \pm 0.006$ |
|            |           |                | HiC-TAD-GGSI | Top 1 | $0.57 \pm 0.0$ | $0.8 \pm 0.0$    | $0.8 \pm 0.0$    |
|            |           |                |              | Top 4 | $0.78 \pm 0.0$ | $0.87 \pm 0.002$ | $0.87 \pm 0.002$ |
| Chimpanzee | $\geq 30$ | $\geq 1.5$ Mbp | HiC-GGSI     | Top 1 | $0.46 \pm 0.0$ | $0.55 \pm 0.041$ | $0.62 \pm 0.066$ |
|            |           |                |              | Top 4 | $0.67 \pm 0.0$ | $0.75 \pm 0.049$ | $0.78 \pm 0.052$ |
|            |           |                | HiC-TAD-GGSI | Top 1 | $0.53 \pm 0.0$ | $0.56 \pm 0.015$ | $0.59 \pm 0.035$ |
|            |           |                |              | Top 4 | $0.71 \pm 0.0$ | $0.78 \pm 0.027$ | $0.79 \pm 0.008$ |
|            |           | $\geq 2$ Mbp   | HiC-GGSI     | Top 1 | $0.46 \pm 0.0$ | $0.53 \pm 0.043$ | $0.59 \pm 0.02$  |
|            |           |                |              | Top 4 | $0.69 \pm 0.0$ | $0.75 \pm 0.039$ | $0.78 \pm 0.035$ |
|            |           |                | HiC-TAD-GGSI | Top 1 | $0.52 \pm 0.0$ | $0.59 \pm 0.022$ | $0.6 \pm 0.015$  |
|            |           |                |              | Top 4 | $0.71 \pm 0.0$ | $0.79 \pm 0.021$ | $0.8 \pm 0.015$  |
|            | $\geq 80$ | $\geq 1.5$ Mbp | HiC-GGSI     | Top 1 | $0.42 \pm 0.0$ | $0.48 \pm 0.061$ | $0.56 \pm 0.048$ |
|            |           |                |              | Top 1 | $0.42 \pm 0.0$ | $0.48 \pm 0.061$ | $0.56 \pm 0.048$ |

|  |  |              |              |       |                |                  |                  |
|--|--|--------------|--------------|-------|----------------|------------------|------------------|
|  |  |              |              | Top 4 | $0.62 \pm 0.0$ | $0.67 \pm 0.047$ | $0.7 \pm 0.083$  |
|  |  |              | HiC-TAD-GGSI | Top 1 | $0.44 \pm 0.0$ | $0.47 \pm 0.032$ | $0.47 \pm 0.088$ |
|  |  |              |              | Top 4 | $0.63 \pm 0.0$ | $0.66 \pm 0.029$ | $0.71 \pm 0.041$ |
|  |  | $\geq 2$ Mbp | HiC-GGSI     | Top 1 | $0.4 \pm 0.0$  | $0.42 \pm 0.038$ | $0.57 \pm 0.103$ |
|  |  |              |              | Top 4 | $0.65 \pm 0.0$ | $0.66 \pm 0.029$ | $0.78 \pm 0.232$ |
|  |  |              | HiC-TAD-GGSI | Top 1 | $0.4 \pm 0.0$  | $0.43 \pm 0.047$ | $0.48 \pm 0.12$  |
|  |  |              |              | Top 4 | $0.66 \pm 0.0$ | $0.67 \pm 0.024$ | $0.65 \pm 0.119$ |
|  |  |              |              |       |                |                  |                  |



Supplementary Table S8 Functionally similar gene pairs from mouse long-range highly interactive regions with functional similarities  $\geq 0.5$ .

| Gene pair distance threshold $\geq$ | Ontology | Chromosome | Functionally similar gene pairs from long-range highly interactive regions (similarity $\geq 0.5$ )                       |
|-------------------------------------|----------|------------|---------------------------------------------------------------------------------------------------------------------------|
| 3.2 Mbp                             | CCO      | 3          | MGI:101784-MGI:3643869                                                                                                    |
|                                     | CCO      | 4          | MGI:1916027-MGI:1913704                                                                                                   |
|                                     | CCO      | 5          | MGI:1891679-MGI:101909<br>MGI:97401-MGI:102851<br>MGI:108059-MGI:101909<br>MGI:1095413-MGI:2385237<br>MGI:97401-MGI:88361 |
|                                     | CCO      | 6          | MGI:97946-MGI:95700                                                                                                       |
|                                     | CCO      | 7          | MGI:98783-MGI:2447816<br>MGI:1924258-MGI:2447816<br>MGI:104605-MGI:2447816<br>MGI:2149590-MGI:2447816                     |
|                                     | MFO      | 9          | MGI:1933847-MGI:3648996                                                                                                   |
|                                     | BPO      | 10         | MGI:3588256-MGI:3649078                                                                                                   |
|                                     | CCO      | 10         | MGI:1861032-MGI:103579<br>MGI:1861032-MGI:1351911<br>MGI:1861032-MGI:99549<br>MGI:3588256-MGI:3649078                     |
|                                     | MFO      | 10         | MGI:1861032-MGI:106618                                                                                                    |

|         |     |    |                                                                                                                                                                                                                                                                                                                           |
|---------|-----|----|---------------------------------------------------------------------------------------------------------------------------------------------------------------------------------------------------------------------------------------------------------------------------------------------------------------------------|
|         |     |    | MGI:1861032-MGI:1918959<br>MGI:3588256-MGI:3649078                                                                                                                                                                                                                                                                        |
|         | CCO | 13 | MGI:97618-MGI:1913472                                                                                                                                                                                                                                                                                                     |
|         | CCO | 15 | MGI:3580656-MGI:109440                                                                                                                                                                                                                                                                                                    |
|         | CCO | 17 | MGI:98643-MGI:98535<br>MGI:3646674-MGI:95936<br>MGI:3646674-MGI:95935                                                                                                                                                                                                                                                     |
|         | MFO | 17 | MGI:98643-MGI:3525201<br>MGI:98643-MGI:104798<br>MGI:98643-MGI:1345189<br>MGI:98643-MGI:104797<br>MGI:98643-MGI:3042141<br>MGI:98643-MGI:97603<br>MGI:98643-MGI:1354739<br>MGI:98643-MGI:1100500<br>MGI:98643-MGI:1101058<br>MGI:98643-MGI:98535<br>MGI:98643-MGI:1341188<br>MGI:98643-MGI:98352<br>MGI:98643-MGI:2443284 |
| 6.4 Mbp | CCO | 4  | MGI:1916027-MGI:1913704                                                                                                                                                                                                                                                                                                   |
|         | CCO | 5  | MGI:108059-MGI:101909                                                                                                                                                                                                                                                                                                     |
|         | CCO | 6  | MGI:97946-MGI:95700                                                                                                                                                                                                                                                                                                       |

|  |     |    |                                                                                                                         |
|--|-----|----|-------------------------------------------------------------------------------------------------------------------------|
|  | CCO | 7  | MGI:98783-MGI:2447816<br>MGI:1924258-MGI:2447816<br>MGI:104605-MGI:2447816<br>MGI:2149590-MGI:2447816                   |
|  | MFO | 9  | MGI:1933847-MGI:3648996                                                                                                 |
|  | BPO | 10 | MGI:3588256-MGI:3649078                                                                                                 |
|  | CCO | 10 | MGI:1861032-MGI:103579<br>MGI:1861032-MGI:1351911<br>MGI:1861032-MGI:99549<br>MGI:3588256-MGI:3649078                   |
|  | MFO | 10 | MGI:1861032-MGI:106618<br>MGI:1861032-MGI:1918959<br>MGI:3588256-MGI:3649078                                            |
|  | CCO | 13 | MGI:97618-MGI:1913472                                                                                                   |
|  | CCO | 15 | MGI:3580656-MGI:109440                                                                                                  |
|  | CCO | 17 | MGI:98643-MGI:98535<br>MGI:3646674-MGI:95936<br>MGI:3646674-MGI:95935                                                   |
|  | MFO | 17 | MGI:98643-MGI:3525201<br>MGI:98643-MGI:104798<br>MGI:98643-MGI:1345189<br>MGI:98643-MGI:104797<br>MGI:98643-MGI:3042141 |

|         |     |    |                                                                                                                                                                         |
|---------|-----|----|-------------------------------------------------------------------------------------------------------------------------------------------------------------------------|
|         |     |    | MGI:98643-MGI:1354739<br>MGI:98643-MGI:1100500<br>MGI:98643-MGI:1101058<br>MGI:98643-MGI:98535<br>MGI:98643-MGI:1341188<br>MGI:98643-MGI:98352<br>MGI:98643-MGI:2443284 |
| 9.6 Mbp | CCO | 4  | MGI:1916027-MGI:1913704                                                                                                                                                 |
|         | CCO | 5  | MGI:108059-MGI:101909                                                                                                                                                   |
|         | MFO | 9  | MGI:1933847-MGI:3648996                                                                                                                                                 |
|         | BPO | 10 | MGI:3588256-MGI:3649078                                                                                                                                                 |
|         | CCO | 10 | MGI:1861032-MGI:103579<br>MGI:1861032-MGI:1351911<br>MGI:1861032-MGI:99549<br>MGI:3588256-MGI:3649078                                                                   |
|         | MFO | 10 | MGI:1861032-MGI:106618<br>MGI:1861032-MGI:1918959<br>MGI:3588256-MGI:3649078                                                                                            |
|         | CCO | 13 | MGI:97618-MGI:1913472                                                                                                                                                   |
|         | CCO | 15 | MGI:3580656-MGI:109440                                                                                                                                                  |
|         | CCO | 17 | MGI:3646674-MGI:95936<br>MGI:3646674-MGI:95935                                                                                                                          |

|        |     |    |                                                                                                                                                                                                                                                      |
|--------|-----|----|------------------------------------------------------------------------------------------------------------------------------------------------------------------------------------------------------------------------------------------------------|
|        | MFO | 17 | MGI:98643-MGI:3525201<br>MGI:98643-MGI:104798<br>MGI:98643-MGI:1345189<br>MGI:98643-MGI:104797<br>MGI:98643-MGI:3042141<br>MGI:98643-MGI:1354739<br>MGI:98643-MGI:1100500<br>MGI:98643-MGI:1101058<br>MGI:98643-MGI:1341188<br>MGI:98643-MGI:2443284 |
| 40 Mbp | MFO | 9  | MGI:1933847-MGI:3648996                                                                                                                                                                                                                              |
|        | CCO | 10 | MGI:1861032-MGI:103579<br>MGI:1861032-MGI:99549                                                                                                                                                                                                      |
|        | MFO | 10 | MGI:1861032-MGI:106618<br>MGI:1861032-MGI:1918959                                                                                                                                                                                                    |
|        | MFO | 17 | MGI:98643-MGI:1101058<br>MGI:98643-MGI:1345189                                                                                                                                                                                                       |

Supplementary Table S9 GO terms enrichment analysis of genes from long-range highly interactive regions. In Figure 5, when the genomic distance threshold was 3.2 Mbp, long-range highly interactive regions with significantly high average function similarities were observed in chromosomes 10 and 17. Enrichment analysis was applied to the genes from these regions. The genes from chromosome 10 do not have an enriched GO term.

| Chromosome | Gene Ontology | GO term name                                            | Expected | Fold enrichment | Raw p-value |
|------------|---------------|---------------------------------------------------------|----------|-----------------|-------------|
| 17         | MFO           | acetyl-CoA C-acetyltransferase activity<br>(GO:0003985) | 0.01     | >100            | 8.94E-05    |
|            |               | N-formyl peptide receptor activity<br>(GO:0004982)      | 0.01     | >100            | 1.15E-04    |
|            |               | RAGE receptor binding<br>(GO:0050786)                   | 0.02     | >100            | 2.10E-04    |

Supplementary Table S10 Mutual pathways of gene pairs from long-range highly interactive regions. In Figure 5, when the gene ontology was MFO, and the genomic distance threshold was 3.2 Mbp, long-range highly interactive regions with significantly high average function similarities were observed in chromosomes 10 and 17. Mutual pathways were found for the genes from these regions. The genes from chromosome 10 do not have a mutual pathway.

| Chromosome | Gene1     | Gene2      | Mutual pathways                 |
|------------|-----------|------------|---------------------------------|
| 17         | MGI:98643 | MGI:104798 | Salmonella infection (mmu05132) |
|            | MGI:98643 | MGI:107812 | Salmonella infection (mmu05132) |

Supplementary Table S11 The mutual pathways of mouse inter-chromosome interactive gene pairs. Gene pairs were sorted by the number of Hi-C raw contacts. The top 7,000 ranked gene pairs were searched for the mutual pathways.

| Gene 1       | Chromosome of gene1 | Gene 2       | Chromosome of gene 2 | Number of Hi-C raw contact | Rank of Hi-C raw contact | Mutual pathways                                            |
|--------------|---------------------|--------------|----------------------|----------------------------|--------------------------|------------------------------------------------------------|
| MGI: 2661445 | 10                  | MGI: 109611  | 13                   | 292                        | 912                      | Arrhythmogenic right ventricular cardiomyopathy (mmu05412) |
| MGI: 1346525 | 11                  | MGI: 109611  | 13                   | 210                        | 1666                     | Arrhythmogenic right ventricular cardiomyopathy (mmu05412) |
| MGI: 109611  | 13                  | MGI: 1338890 | 14                   | 168                        | 2446                     | Arrhythmogenic right ventricular cardiomyopathy (mmu05412) |
| MGI: 88275   | 6                   | MGI: 109611  | 13                   | 158                        | 2720                     | Arrhythmogenic right ventricular cardiomyopathy (mmu05412) |
| MGI: 94909   | X                   | MGI: 109611  | 13                   | 140                        | 3274                     | Arrhythmogenic right ventricular cardiomyopathy (mmu05412) |
| MGI: 103013  | 6                   | MGI: 109611  | 13                   | 114                        | 4584                     | Arrhythmogenic right ventricular cardiomyopathy (mmu05412) |
| MGI: 99912   | 10                  | MGI: 109611  | 13                   | 102                        | 5441                     | Arrhythmogenic right ventricular cardiomyopathy (mmu05412) |
| MGI: 1914047 | 6                   | MGI: 1096389 | 12                   | 100                        | 5588                     | Cell adhesion molecules (mmu04514)                         |
| MGI: 88295   | 5                   | MGI: 109611  | 13                   | 98                         | 5739                     | Arrhythmogenic right ventricular cardiomyopathy (mmu05412) |



|                     |    |                     |    |    |      |                                                                                |
|---------------------|----|---------------------|----|----|------|--------------------------------------------------------------------------------|
| MGI:<br>9552<br>3   | 7  | MGI:<br>2661<br>445 | 10 | 94 | 6110 | Pathways in cancer<br>(mmu05200),<br>Gastric cancer (mmu05226)                 |
| MGI:<br>1096<br>11  | 13 | MGI:<br>8829<br>3   | 14 | 94 | 6116 | Arrhythmogenic right<br>ventricular cardiomyopathy<br>(mmu05412)               |
| MGI:<br>9552<br>3   | 7  | MGI:<br>9486<br>9   | 18 | 92 | 6285 | Pathways in cancer (mmu05200)                                                  |
| MGI:<br>1354<br>953 | 5  | MGI:<br>9552<br>3   | 7  | 86 | 6791 | PI3K-Akt signaling pathway<br>(mmu04151), Rap1 signaling<br>pathway (mmu04015) |
| MGI:<br>1030<br>13  | 6  | MGI:<br>9552<br>3   | 7  | 86 | 6879 | MAPK signaling pathway<br>(mmu04010), Calcium signaling<br>pathway (mmu04020)  |
